# Supplementary material
Source: PubMed Central journal article supplement (PMC5033841)
Supplement: jciinsight-1-89014-s001.pdf [file jciinsight-1-89014-s001.pdf]

Supplementary Figure 1. Flow cytometry panels used for BD Canto (A) and BD Fortessa (B).

A

|                 |         | Name       | ID | Fluorochrome |               |               |              |         |              |        |
|-----------------|---------|------------|----|--------------|---------------|---------------|--------------|---------|--------------|--------|
|                 |         |            |    | AF488        | PE            | PerCp-Cy5.5   | APC          | PacBlue | PE-Cy7       | APC-H7 |
| Immune Analysis | Surface | Lympho*    | 1  | CD56         | <b>CD8</b>    | CD16          | <b>CD3</b>   | CD45    | CD19         | CD4    |
|                 |         | T1*        | 2  | CD4          | CD38          | <b>HLA-DR</b> | CD45RA       | CCR7    | CD3          | CD8    |
|                 |         | T2         | 3  | CD45         | Tim-3         | CD8           | <b>LAG3</b>  | CD3     | PD-1         | CD4    |
|                 |         | T2 iso     | 4  | CD45         | iso           | CD8           | <b>iso</b>   | CD3     | iso          | CD4    |
|                 |         | T3         | 5  | CD4          | Tim3          | CD8           | CD45RO       | CD3     | PD-1         | CD45RA |
|                 |         | T4         | 6  | <b>CD11a</b> | <b>CD69</b>   | CD8           | CXCR3        | CD3     | PD-1         | CD4    |
|                 |         | Myelo*     | 7  | CD45         | CD66b         | <b>HLA-DR</b> | CD33         | CD14    | CD123        | CD16   |
|                 |         | Tumor*     | 8  | CD45         | PD-L2         | CD66b         | PD-L1        | CD33    | <u>EpCAM</u> | CD14   |
|                 |         | Tumor iso* | 9  | CD45         | iso           | CD66b         | iso (PD-L1)  | CD33    | <u>EpCAM</u> | CD14   |
|                 | Intra   | T1         | 10 | CD45         | <b>CTLA-4</b> | CD8           | <b>FOXP3</b> | CD3     | PD-1         | CD4    |
|                 |         | T2         | 11 | CD45         | <b>iso</b>    | CD8           | <b>FOXP3</b> | CD3     | iso          | CD4    |
|                 |         | T3         | 12 | CD45         | Tim-3         | CD8           | <b>FOXP3</b> | CD3     | <b>Ki67</b>  | CD4    |
| <b>Sorting</b>  |         |            | 1  | CD45         | CD56          | CD8           | CD33         | EpCAM   | CD4          | CD16   |

B

| Ab          | FITC  | PerCP<br>Cy5.5 | PE        | PE-<br>CF594 | PE/Cy7 | APC   | Alexa<br>700 | APC/<br>Cy7 | BV421  | BV510  | BV605  | BV711 | BV780 |
|-------------|-------|----------------|-----------|--------------|--------|-------|--------------|-------------|--------|--------|--------|-------|-------|
| Lymphocytes | IL-10 | CD8            | CXCR<br>5 | CD56         | CD25   | FoxP3 | CD3          | L/D         | PD-1   | CD40L  | Ki67   | CD45  | CD4   |
| T cells     | CD69  | CD8            | CD38      | CCR7         | CTLA-4 | TIM-3 | CD3          | L/D         | PD-1   | CD45RA | CD45RO | CD45  | CD4   |
| Myeloid     | CD16  | CD33           | PD-L2     | CD163        | CD83   | PD-L1 |              | L/D         | HLA-DR | CD15   | CD123  | CD45  | CD14  |
| B cells     | IL-10 | CD21           | CD38      | CD27         | CD19   | PD-L1 |              | L/D         | HLA-DR | CD24   | IgM    | CD45  | CD20  |

Supplementary Figure 2. PD-1/TIM-3 co-expression by CD8<sup>+</sup> T cells (A) and CD4<sup>+</sup> T cells (B) based on clinical features.

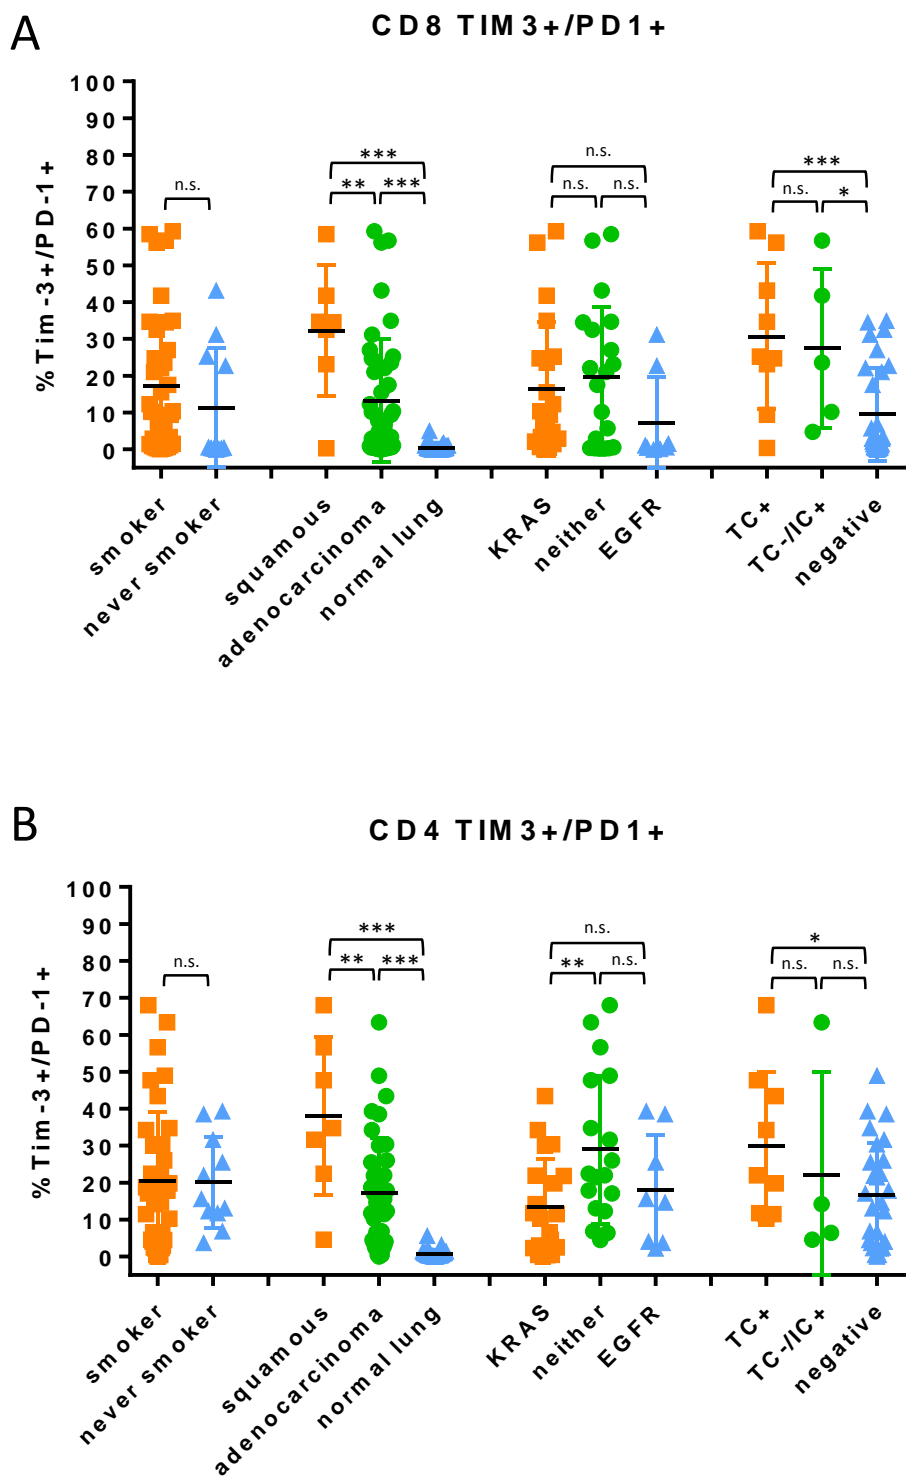

Supplementary Figure 3. Percent of PD-L1<sup>+</sup> epithelial cells (EpCAM<sup>+</sup>) detected by flow correlates with the percent of PD-L1 in tumor cells by IHC (A). Both correlate with “hot” and “cold” cluster breakdown (B).

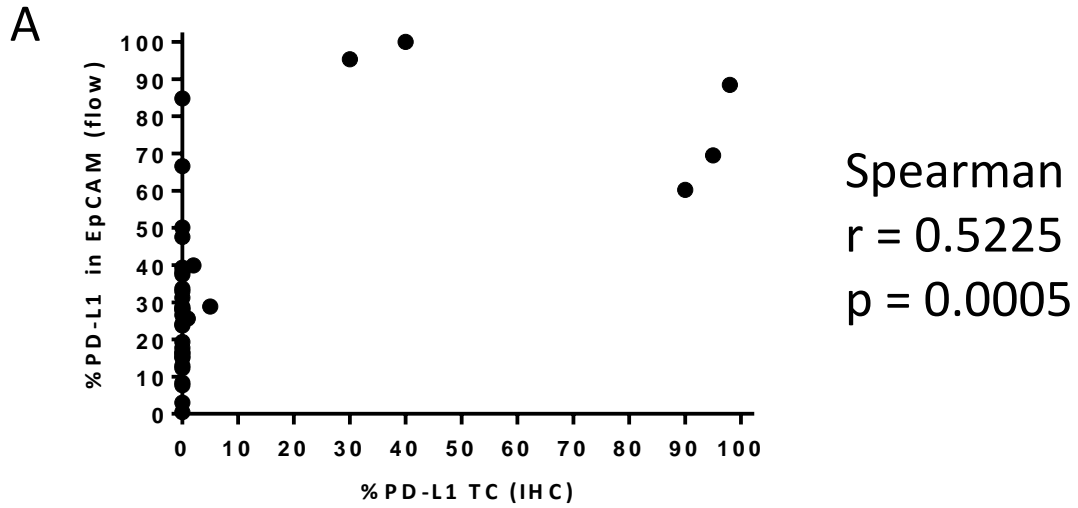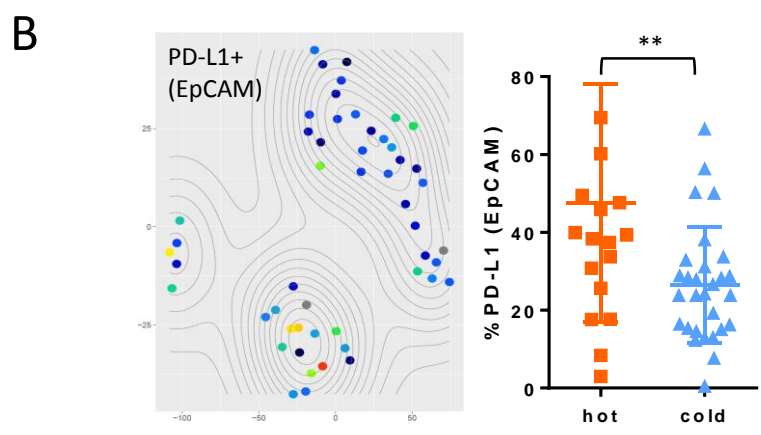

Supplementary Figure 4. Strong correlation between %PD-1 and %TIM-3 expression by both CD8<sup>+</sup> T cells (A) and CD4<sup>+</sup> T cells (B).

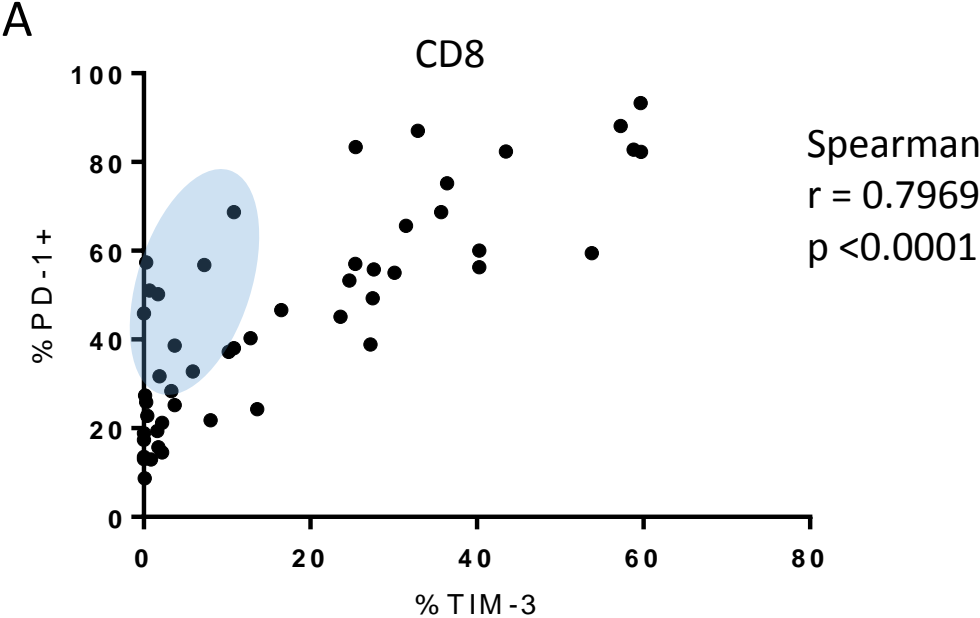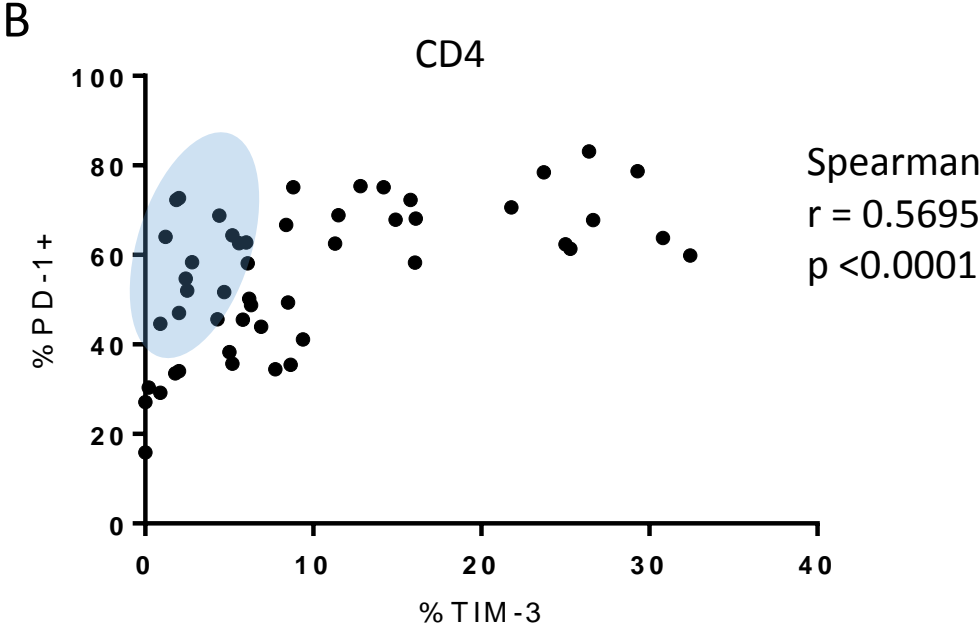

Supplementary Figure 5. Number of mutations detected by OncoPanel sequencing highly correlates with patient reported smoking status in pack-years.

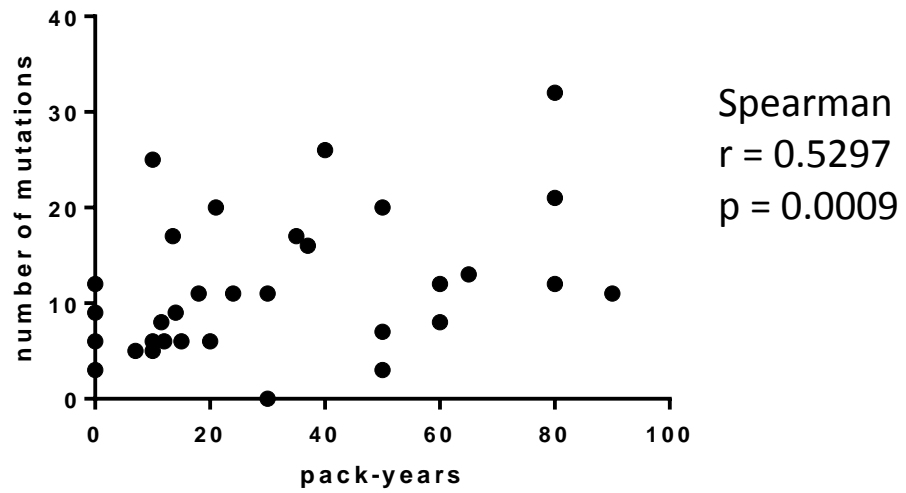

Supplementary Figure 6. Significantly differentially regulated genes by Nanostring in “hot” versus “cold” immunophenotypic clusters.

|         | Log2 fold change | Lower confidence limit | Upper confidence limit | P-value  | FDR      | Gene.sets                                                             |
|---------|------------------|------------------------|------------------------|----------|----------|-----------------------------------------------------------------------|
| ADA     | 2.08             | 1.48                   | 2.69                   | 2.93E-07 | 0.000214 | B-Cell Functions, T-Cell Functions                                    |
| C4BPA   | -4.45            | -6.14                  | -2.76                  | 2.04E-05 | 0.00538  | Complement                                                            |
| GZMB    | 1.57             | 0.959                  | 2.17                   | 2.57E-05 | 0.00538  | Cell Functions, Cytotoxicity                                          |
| FOS     | -2.38            | -3.31                  | -1.45                  | 2.95E-05 | 0.00538  |                                                                       |
| TNFSF4  | 1.41             | 0.845                  | 1.97                   | 3.81E-05 | 0.00556  | Chemokines, TNF Superfamily                                           |
| TOLLIP  | -0.569           | -0.807                 | -0.331                 | 7.01E-05 | 0.00708  |                                                                       |
| C8B     | -1.74            | -2.47                  | -1.01                  | 7.49E-05 | 0.00708  | Complement                                                            |
| CXCL10  | 2.46             | 1.42                   | 3.5                    | 8.48E-05 | 0.00708  | Chemokines, Cytokines, Pathogen Defense, Regulation, T-Cell Functions |
| CDK1    | 1.63             | 0.934                  | 2.32                   | 8.73E-05 | 0.00708  |                                                                       |
| CXCL9   | 2.49             | 1.41                   | 3.57                   | 0.000108 | 0.00785  | Chemokines, Regulation, T-Cell Functions                              |
| VEGFC   | 1.54             | 0.855                  | 2.23                   | 0.000153 | 0.00977  |                                                                       |
| CREBBP  | -0.859           | -1.24                  | -0.475                 | 0.000161 | 0.00977  |                                                                       |
| CXCL13  | 2.72             | 1.48                   | 3.97                   | 0.000213 | 0.0115   | Chemokines                                                            |
| ITGA5   | 1.7              | 0.915                  | 2.48                   | 0.000228 | 0.0115   | Adhesion                                                              |
| CTSH    | -1.71            | -2.5                   | -0.915                 | 0.000247 | 0.0115   |                                                                       |
| BIRC5   | 1.51             | 0.805                  | 2.21                   | 0.000261 | 0.0115   | Cell Cycle                                                            |
| FOXJ1   | -3.43            | -5.05                  | -1.82                  | 0.000282 | 0.0115   |                                                                       |
| STAT1   | 1.36             | 0.723                  | 2.01                   | 0.000284 | 0.0115   | Chemokines, Regulation                                                |
| CCL17   | -2.37            | -3.5                   | -1.24                  | 0.000318 | 0.0122   | Chemokines                                                            |
| EGR1    | -1.87            | -2.78                  | -0.951                 | 0.000444 | 0.0156   | Senescence, T-Cell Functions                                          |
| TNFSF15 | -1.48            | -2.2                   | -0.753                 | 0.00045  | 0.0156   | Chemokines, TNF Superfamily                                           |
| PLA2G1B | -3.13            | -4.68                  | -1.58                  | 0.000482 | 0.016    | Regulation                                                            |
| PRKCE   | -0.759           | -1.14                  | -0.381                 | 0.000519 | 0.0165   | Macrophage Functions                                                  |
| IL6R    | -1.11            | -1.66                  | -0.553                 | 0.00055  | 0.0167   | Cytokines                                                             |
| VCAM1   | 2.05             | 0.999                  | 3.1                    | 0.000705 | 0.0206   | Adhesion, Regulation                                                  |
| TTK     | 1.37             | 0.656                  | 2.08                   | 0.000828 | 0.0232   |                                                                       |
| SIGIRR  | -0.984           | -1.5                   | -0.464                 | 0.000951 | 0.0257   |                                                                       |
| CD1C    | -1.55            | -2.38                  | -0.723                 | 0.00104  | 0.0271   | T-Cell Functions                                                      |
| CCL8    | 1.51             | 0.702                  | 2.32                   | 0.00108  | 0.0272   | Chemokines, Regulation                                                |
| PBK     | 1.32             | 0.611                  | 2.04                   | 0.00113  | 0.0276   |                                                                       |
| ICAM4   | -2.71            | -4.18                  | -1.25                  | 0.00118  | 0.0279   | Adhesion, Regulation                                                  |
| STAT6   | -1.07            | -1.65                  | -0.488                 | 0.00125  | 0.028    | Chemokines, Regulation, T-Cell Functions                              |
| CCND3   | -1.3             | -2.01                  | -0.593                 | 0.00127  | 0.028    | Cell Cycle                                                            |
| C6      | -2               | -3.09                  | -0.899                 | 0.00137  | 0.0281   | Complement                                                            |
| NUP107  | 0.621            | 0.279                  | 0.962                  | 0.00138  | 0.0281   | Cell Cycle                                                            |
| RORC    | -2.32            | -3.6                   | -1.05                  | 0.00138  | 0.0281   | Cell Functions                                                        |
| FCER1A  | -1.98            | -3.08                  | -0.884                 | 0.00149  | 0.0294   |                                                                       |
| IL18    | 1.02             | 0.451                  | 1.59                   | 0.00157  | 0.0301   | Interleukins, T-Cell Functions                                        |
| PRG2    | -1.16            | -1.82                  | -0.497                 | 0.00196  | 0.0367   | Pathogen Defense                                                      |
| FCGR3A  | 1.27             | 0.538                  | 2.01                   | 0.00213  | 0.0389   | Regulation                                                            |
| CCL23   | -1.4             | -2.21                  | -0.584                 | 0.00231  | 0.041    | Chemokines, Regulation                                                |
| COL3A1  | 3.23             | 1.34                   | 5.12                   | 0.00236  | 0.041    | Regulation                                                            |
| RRAD    | -2               | -3.17                  | -0.82                  | 0.00255  | 0.0433   | Cell Functions                                                        |
| REPS1   | 0.567            | 0.23                   | 0.904                  | 0.00275  | 0.0456   | Cell Functions                                                        |

A

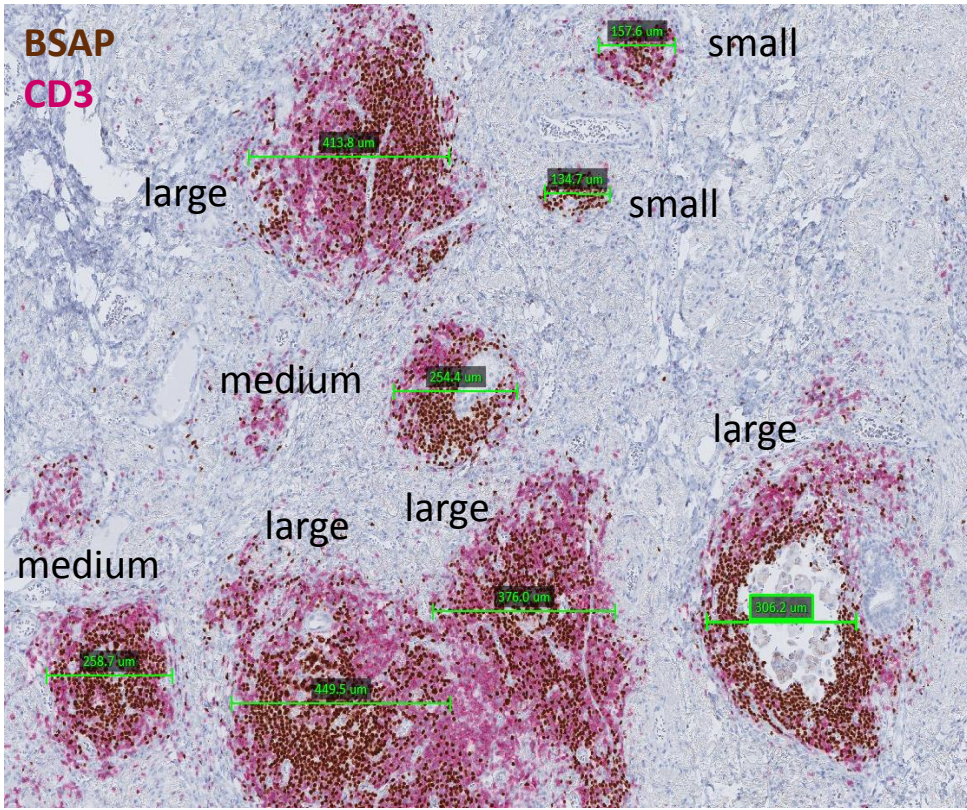

Supplementary Figure 7. TLS size was accessed for quantification (A). Percent of CD19<sup>+</sup> B cells defined by flow correlates with the Nanostring counts for CD19 gene expression (B) and B cell count by IHC (C). TLS score highly correlates with abundance of B cells quantified by flow (D) but not with “hot” or “cold” immunophenotype (E). Scale bars measuring TLS size to the tenth of a µm are overlaid onto image.

B

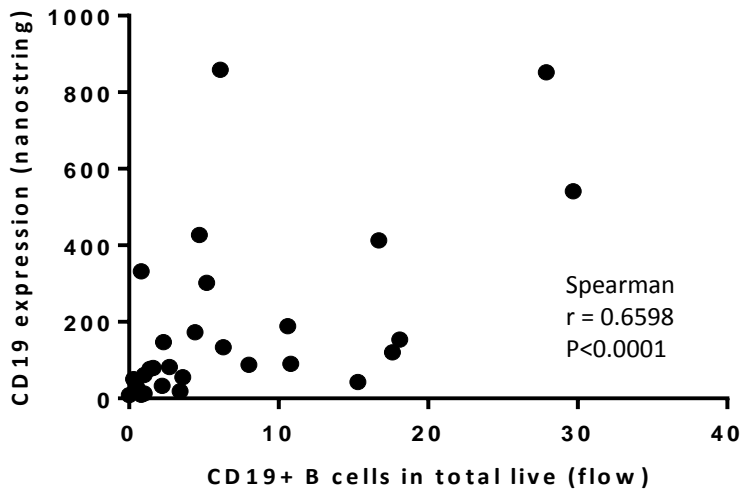

C

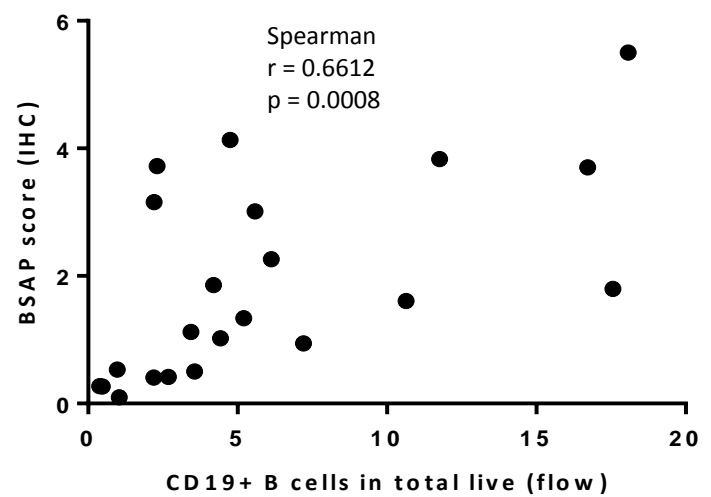

D

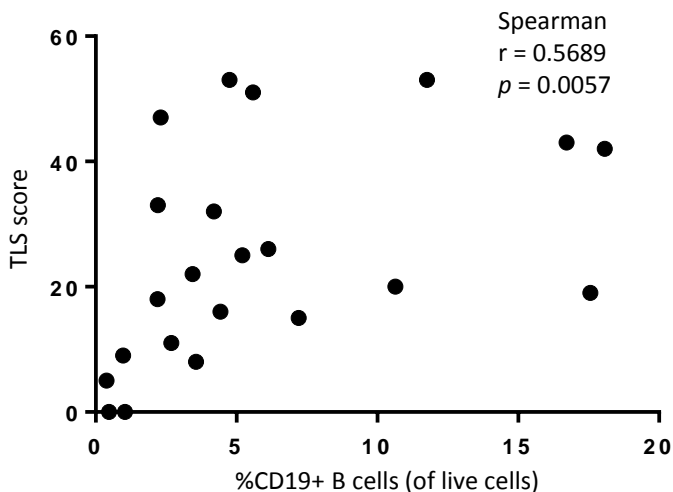

E

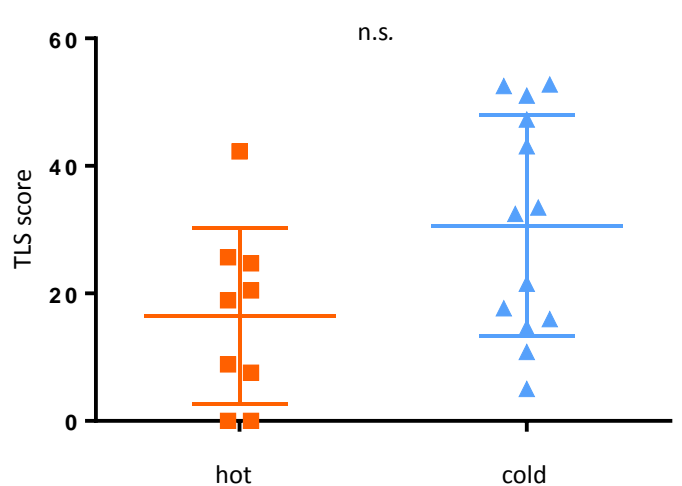

Supplementary Figure 8. No significant differences between Ig light chains between tumor B cells and normal lung B cells or between IL-10<sup>+</sup> B cells and IL-10<sup>-</sup> B cells.

|                           | Normal | Tumor |
|---------------------------|--------|-------|
| <i>kappa</i>              | 20     | 42    |
| <i>lambda</i>             | 17     | 35    |
| <i>similar_expression</i> | 10     | 6     |

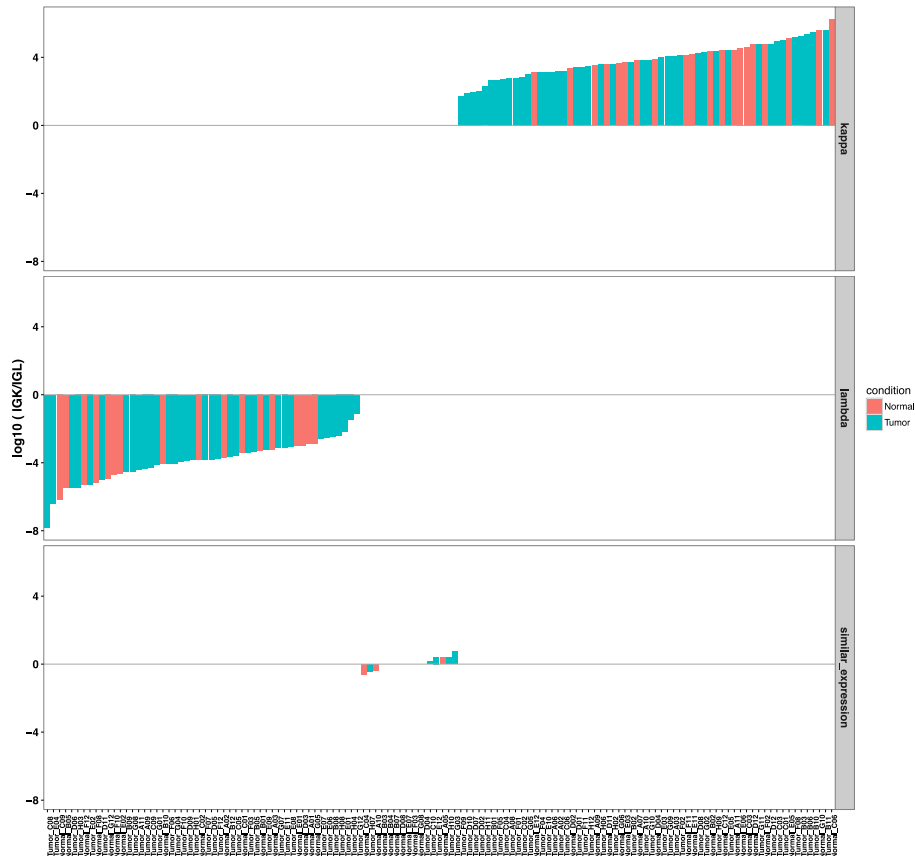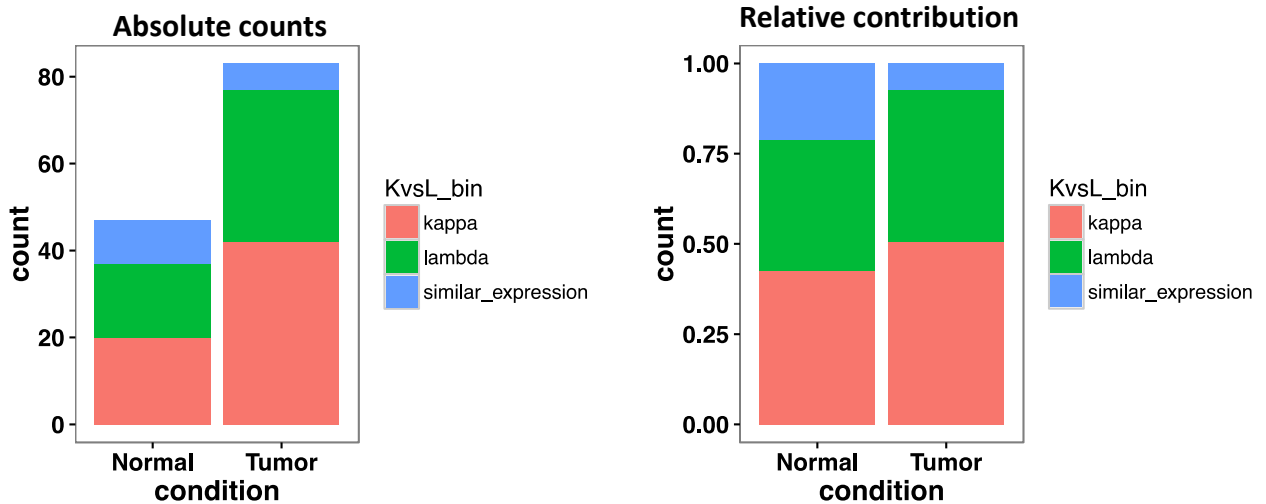



Supplementary Figure 9. Immune parameters used for clustering in Figure 4.

|    | immune parameter             |
|----|------------------------------|
| 1  | %EpCAM+ cells (live cells)   |
| 2  | %CD45+ cells (live cells)    |
| 3  | %CD3+ T cells (CD45+)        |
| 4  | %CD19+ T cells (CD45+)       |
| 5  | %CD56+ NK cells (CD45+)      |
| 6  | %CD33+ monocytes (CD45+)     |
| 7  | %CD66b+ granulocytes (CD45+) |
| 8  | %CD16+ NK cells              |
| 9  | %CD8+ T cells (CD3+)         |
| 10 | CD8/CD4 T cell ratio         |
| 11 | %TIM-3+ (CD4+ T cells)       |
| 12 | %PD-1+ (CD4+ T cells)        |
| 13 | %TIM-3+ (CD8+ T cells)       |
| 14 | %PD-1+ (CD8+ T cells)        |
| 15 | %CD4+ T cells (CD3+)         |
